# Supplementary material
Source: publisher site journal article supplement (https://www.dovepress.com/article/336213)
Supplement: Supplementary file 1 [file get_supplementary_file.php]

**Supplementary Table 1 Clinical and molecular characteristics of the 103 gliomas**

| Number | Gender | Year | Locus | Histology     | Who grade | <i>MGMTp</i> | <i>m-IDH1</i> | <i>IDH2</i> | <i>TERTp</i> |
|--------|--------|------|-------|---------------|-----------|--------------|---------------|-------------|--------------|
| 1      | female | 26   | left  | astrocytoma   | 2         | yes          | wild-type     | wild-type   | wild-type    |
| 2      | female | 83   | left  | astrocytoma   | 2         | yes          | wild-type     | wild-type   | wild-type    |
| 3      | female | 27   | right | astrocytoma   | 2         | yes          | mutation      | wild-type   | wild-type    |
| 4      | female | 46   | left  | glioblastoma  | 4         | no           | wild-type     | wild-type   | mutation     |
| 5      | female | 20   | right | glioblastoma  | 4         | yes          | wild-type     | wild-type   | wild-type    |
| 6      | male   | 45   | left  | glioblastoma  | 4         | yes          | wild-type     | wild-type   | mutation     |
| 7      | female | 73   | right | glioblastoma  | 4         | yes          | wild-type     | wild-type   | mutation     |
| 8      | male   | 29   | left  | astrocytoma   | 2         | yes          | mutation      | wild-type   | wild-type    |
| 9      | male   | 41   | right | astrocytoma   | 2         | yes          | mutation      | wild-type   | wild-type    |
| 10     | female | 47   | left  | astrocytoma   | 2         | yes          | wild-type     | wild-type   | wild-type    |
| 11     | female | 54   | other | glioblastoma  | 4         | yes          | wild-type     | wild-type   | mutation     |
| 12     | male   | 52   | left  | glioblastoma  | 4         | no           | wild-type     | wild-type   | mutation     |
| 13     | male   | 65   | other | glioblastoma  | 4         | no           | wild-type     | wild-type   | wild-type    |
| 14     | male   | 57   | right | glioblastoma  | 4         | no           | wild-type     | wild-type   | mutation     |
| 15     | male   | 49   | left  | glioblastoma  | 4         | yes          | wild-type     | wild-type   | mutation     |
| 16     | female | 53   | left  | astrocytoma   | 2         | no           | wild-type     | wild-type   | mutation     |
| 17     | female | 26   | left  | astrocytoma   | 2         | yes          | mutation      | wild-type   | wild-type    |
| 18     | female | 41   | right | anaplastic as | 3         | yes          | mutation      | wild-type   | wild-type    |
| 19     | female | 61   | right | anaplastic as | 3         | yes          | wild-type     | wild-type   | mutation     |
| 20     | female | 45   | left  | anaplastic as | 3         | yes          | mutation      | wild-type   | wild-type    |
| 21     | female | 49   | left  | anaplastic as | 3         | no           | mutation      | wild-type   | wild-type    |
| 22     | female | 38   | left  | anaplastic as | 3         | yes          | mutation      | wild-type   | wild-type    |
| 23     | female | 42   | right | anaplastic as | 3         | no           | wild-type     | wild-type   | wild-type    |
| 24     | female | 53   | left  | anaplastic as | 3         | yes          | wild-type     | wild-type   | wild-type    |
| 25     | female | 23   | left  | astrocytoma   | 2         | yes          | mutation      | wild-type   | wild-type    |
| 26     | female | 49   | right | astrocytoma   | 2         | yes          | mutation      | wild-type   | wild-type    |
| 27     | male   | 26   | right | anaplastic as | 3         | no           | mutation      | wild-type   | wild-type    |
| 28     | female | 28   | other | astrocytoma   | 2         | no           | wild-type     | wild-type   | wild-type    |
| 29     | male   | 39   | right | astrocytoma   | 2         | yes          | mutation      | wild-type   | wild-type    |
| 30     | female | 47   | left  | astrocytoma   | 2         | no           | wild-type     | wild-type   | wild-type    |
| 31     | male   | 34   | right | astrocytoma   | 2         | no           | wild-type     | wild-type   | wild-type    |
| 32     | female | 51   | other | astrocytoma   | 2         | no           | wild-type     | wild-type   | wild-type    |
| 33     | male   | 50   | right | anaplastic as | 3         | yes          | mutation      | wild-type   | wild-type    |
| 34     | female | 51   | other | anaplastic as | 3         | no           | wild-type     | wild-type   | mutation     |
| 35     | male   | 50   | right | anaplastic as | 3         | no           | wild-type     | wild-type   | wild-type    |
| 36     | male   | 46   | right | anaplastic as | 3         | no           | mutation      | wild-type   | wild-type    |
| 37     | female | 34   | left  | astrocytoma   | 2         | yes          | mutation      | wild-type   | mutation     |
| 38     | female | 50   | left  | anaplastic as | 3         | yes          | mutation      | wild-type   | mutation     |
| 39     | female | 36   | right | anaplastic as | 3         | no           | mutation      | wild-type   | wild-type    |
| 40     | male   | 17   | left  | anaplastic as | 3         | no           | wild-type     | wild-type   | wild-type    |
| 41     | female | 50   | other | anaplastic ol | 3         | yes          | mutation      | wild-type   | mutation     |
| 42     | male   | 60   | right | anaplastic ol | 3         | yes          | mutation      | wild-type   | mutation     |
| 43     | male   | 49   | right | glioblastoma  | 4         | yes          | wild-type     | wild-type   | mutation     |
| 44     | female | 44   | right | anaplastic ol | 3         | yes          | wild-type     | mutation    | wild-type    |
| 45     | female | 45   | right | anaplastic ol | 3         | yes          | mutation      | wild-type   | mutation     |
| 46     | male   | 55   | left  | anaplastic as | 3         | yes          | mutation      | wild-type   | mutation     |
| 47     | male   | 56   | right | anaplastic as | 3         | no           | wild-type     | wild-type   | mutation     |
| 48     | male   | 36   | left  | anaplastic as | 3         | yes          | mutation      | wild-type   | wild-type    |
| 49     | male   | 67   | left  | anaplastic as | 3         | yes          | wild-type     | wild-type   | mutation     |
| 50     | male   | 43   | left  | anaplastic ol | 3         | yes          | mutation      | wild-type   | mutation     |
| 51     | male   | 56   | right | anaplastic ol | 3         | yes          | wild-type     | wild-type   | mutation     |
| 52     | female | 66   | left  | anaplastic ol | 3         | yes          | mutation      | wild-type   | mutation     |
| 53     | male   | 50   | left  | anaplastic ol | 3         | yes          | mutation      | wild-type   | mutation     |
| 54     | female | 67   | left  | anaplastic ol | 3         | yes          | wild-type     | wild-type   | wild-type    |
| 55     | male   | 51   | left  | glioblastoma  | 4         | no           | mutation      | wild-type   | wild-type    |
| 56     | male   | 58   | right | glioblastoma  | 4         | yes          | wild-type     | wild-type   | mutation     |
| 57     | male   | 47   | other | glioblastoma  | 4         | no           | wild-type     | wild-type   | mutation     |
| 58     | female | 54   | left  | glioblastoma  | 4         | yes          | mutation      | wild-type   | wild-type    |
| 59     | female | 55   | left  | anaplastic ol | 3         | yes          | mutation      | wild-type   | mutation     |

|     |        |    |       |               |   |     |           |           |           |
|-----|--------|----|-------|---------------|---|-----|-----------|-----------|-----------|
| 60  | female | 27 | left  | anaplastic ol | 3 | yes | mutation  | wild-type | mutation  |
| 61  | male   | 53 | right | anaplastic ol | 3 | no  | wild-type | wild-type | wild-type |
| 62  | male   | 45 | left  | glioblastoma  | 4 | no  | mutation  | wild-type | wild-type |
| 63  | male   | 48 | left  | glioblastoma  | 4 | yes | wild-type | wild-type | wild-type |
| 64  | female | 41 | other | glioblastoma  | 4 | yes | wild-type | wild-type | wild-type |
| 65  | female | 72 | left  | glioblastoma  | 4 | yes | wild-type | wild-type | mutation  |
| 66  | female | 45 | left  | glioblastoma  | 4 | yes | wild-type | wild-type | mutation  |
| 67  | female | 70 | left  | glioblastoma  | 4 | yes | wild-type | wild-type | wild-type |
| 68  | female | 61 | right | oligodendroꝰ  | 2 | yes | mutation  | wild-type | mutation  |
| 69  | male   | 53 | right | oligodendroꝰ  | 2 | yes | mutation  | wild-type | mutation  |
| 70  | female | 70 | right | glioblastoma  | 4 | yes | wild-type | wild-type | mutation  |
| 71  | male   | 39 | left  | glioblastoma  | 4 | no  | wild-type | wild-type | mutation  |
| 72  | female | 61 | other | glioblastoma  | 4 | yes | wild-type | wild-type | mutation  |
| 73  | male   | 67 | right | glioblastoma  | 4 | yes | wild-type | wild-type | mutation  |
| 74  | female | 66 | right | glioblastoma  | 4 | no  | wild-type | wild-type | mutation  |
| 75  | male   | 55 | left  | glioblastoma  | 4 | yes | wild-type | wild-type | mutation  |
| 76  | male   | 62 | right | glioblastoma  | 4 | no  | wild-type | wild-type | wild-type |
| 77  | female | 41 | right | glioblastoma  | 4 | no  | mutation  | wild-type | wild-type |
| 78  | male   | 46 | right | glioblastoma  | 4 | yes | wild-type | wild-type | mutation  |
| 79  | male   | 50 | right | glioblastoma  | 4 | no  | wild-type | wild-type | mutation  |
| 80  | female | 51 | left  | glioblastoma  | 4 | yes | wild-type | wild-type | mutation  |
| 81  | female | 75 | left  | glioblastoma  | 4 | yes | wild-type | wild-type | mutation  |
| 82  | male   | 38 | left  | oligodendroꝰ  | 2 | yes | mutation  | wild-type | mutation  |
| 83  | female | 40 | left  | oligodendroꝰ  | 2 | yes | mutation  | wild-type | mutation  |
| 84  | female | 47 | left  | oligodendroꝰ  | 2 | yes | wild-type | mutation  | mutation  |
| 85  | female | 54 | left  | oligodendroꝰ  | 2 | yes | mutation  | wild-type | mutation  |
| 86  | male   | 42 | other | oligodendroꝰ  | 2 | yes | wild-type | wild-type | wild-type |
| 87  | male   | 55 | right | glioblastoma  | 4 | yes | wild-type | wild-type | mutation  |
| 88  | female | 36 | left  | oligodendroꝰ  | 2 | yes | mutation  | wild-type | mutation  |
| 89  | male   | 51 | right | oligodendroꝰ  | 2 | yes | mutation  | wild-type | mutation  |
| 90  | male   | 40 | right | oligodendroꝰ  | 3 | yes | mutation  | wild-type | mutation  |
| 91  | female | 53 | left  | glioblastoma  | 4 | no  | wild-type | wild-type | wild-type |
| 92  | male   | 54 | right | glioblastoma  | 4 | yes | wild-type | wild-type | mutation  |
| 93  | female | 42 | other | glioblastoma  | 4 | no  | wild-type | wild-type | mutation  |
| 94  | female | 29 | left  | oligodendroꝰ  | 2 | yes | wild-type | wild-type | mutation  |
| 95  | female | 56 | right | oligodendroꝰ  | 2 | yes | mutation  | wild-type | mutation  |
| 96  | female | 32 | right | oligodendroꝰ  | 2 | yes | mutation  | wild-type | mutation  |
| 97  | male   | 29 | right | oligodendroꝰ  | 2 | yes | wild-type | mutation  | mutation  |
| 98  | female | 53 | right | oligodendroꝰ  | 2 | no  | mutation  | wild-type | mutation  |
| 99  | female | 16 | left  | astrocytoma   | 2 | yes | wild-type | wild-type | wild-type |
| 100 | male   | 54 | left  | oligodendroꝰ  | 2 | yes | mutation  | wild-type | mutation  |
| 101 | male   | 74 | left  | oligodendroꝰ  | 2 | yes | mutation  | wild-type | mutation  |
| 102 | female | 63 | right | oligodendroꝰ  | 2 | yes | wild-type | wild-type | mutation  |
| 103 | female | 50 | right | oligoastrocyt | 2 | yes | mutation  | wild-type | mutation  |

| Number | <i>BRAF</i> | 1p/19q      | Ki-67 (%) | p53 (%) | Outcome (1, Survival time (months)) |    |
|--------|-------------|-------------|-----------|---------|-------------------------------------|----|
| 1      | wild-type   | no deletion | 5         | 0       | 0                                   | 36 |
| 2      | wild-type   | no deletion | 10        | 0       | 0                                   | 35 |
| 3      | wild-type   | no deletion | 3         | 30      | 0                                   | 33 |
| 4      | mutation    | no deletion | 10        | 5       | 0                                   | 41 |
| 5      | wild-type   | no deletion | 20        | 60      | 0                                   | 34 |
| 6      | wild-type   | no deletion | 30        | 3       | 0                                   | 34 |
| 7      | wild-type   | no deletion | 30        | 40      | 0                                   | 18 |
| 8      | mutation    | no deletion | 3         | 0       | 0                                   | 27 |
| 9      | wild-type   | no deletion | 10        | 40      | 0                                   | 27 |
| 10     | wild-type   | no deletion | 1         | 0       | 1                                   | 6  |
| 11     | wild-type   | 1p-deletion | 10        | 0       | 0                                   | 17 |
| 12     | wild-type   | no deletion | 50        | 5       | 0                                   | 16 |
| 13     | wild-type   | no deletion | 20        | 0       | 0                                   | 16 |
| 14     | wild-type   | no deletion | 20        | 10      | 0                                   | 16 |
| 15     | wild-type   | no deletion | 15        | 20      | 0                                   | 15 |

|    |           |              |    |     |   |      |
|----|-----------|--------------|----|-----|---|------|
| 16 | mutation  | 1p-deletion  | 10 | 5   | 1 | 9    |
| 17 | wild-type | no deletion  | 20 | 50  | 1 | 2    |
| 18 | wild-type | no deletion  | 15 | 40  | 0 | 39   |
| 19 | wild-type | codeletion   | 10 | 20  | 0 | 31   |
| 20 | wild-type | 19q-deletion | 5  | 90  | 0 | 31   |
| 21 | wild-type | no deletion  | 10 | 40  | 0 | 41   |
| 22 | wild-type | no deletion  | 8  | 70  | 0 | 30   |
| 23 | mutation  | no deletion  | 2  | 0   | 0 | 41   |
| 24 | wild-type | 1p-deletion  | 20 | 1   | 0 | 26   |
| 25 | wild-type | codeletion   | 5  | 5   | 0 | 40   |
| 26 | wild-type | no deletion  | 5  | 20  | 0 | 38   |
| 27 | wild-type | no deletion  | 7  | 70  | 0 | 19   |
| 28 | wild-type | no deletion  | 3  | 5   | 0 | 26   |
| 29 | wild-type | no deletion  | 1  | 10  | 0 | 26   |
| 30 | wild-type | no deletion  | 1  | 0   | 0 | 30   |
| 31 | mutation  | no deletion  | 3  | 10  | 0 | 28   |
| 32 | wild-type | no deletion  | 5  | 1   | 0 | 27   |
| 33 | wild-type | no deletion  | 1  | 1   | 0 | 22   |
| 34 | wild-type | no deletion  | 10 | 30  | 0 | 18   |
| 35 | wild-type | no deletion  | 5  | 0   | 0 | 10   |
| 36 | wild-type | no deletion  | 7  | 40  | 0 | 17   |
| 37 | wild-type | codeletion   | 4  | 1   | 0 | 16   |
| 38 | wild-type | codeletion   | 15 | 10  | 0 | 15   |
| 39 | wild-type | no deletion  | 8  | 5   | 0 | 17   |
| 40 | wild-type | no deletion  | 5  | 30  | 1 | 25   |
| 41 | wild-type | codeletion   | 10 | 0   | 0 | 42   |
| 42 | wild-type | codeletion   | 20 | 0   | 0 | 41   |
| 43 | wild-type | no deletion  | 40 | 0   | 0 | 8    |
| 44 | wild-type | codeletion   | 20 | 5   | 0 | 34   |
| 45 | wild-type | codeletion   | 10 | 0   | 0 | 32   |
| 46 | wild-type | codeletion   | 5  | 0   | 1 | 8    |
| 47 | wild-type | no deletion  | 30 | 20  | 1 | 3    |
| 48 | wild-type | no deletion  | 10 | 100 | 1 | 10   |
| 49 | wild-type | no deletion  | 30 | 80  | 1 | 2    |
| 50 | wild-type | codeletion   | 15 | 1   | 0 | 11   |
| 51 | wild-type | no deletion  | 15 | 1   | 0 | 16   |
| 52 | wild-type | codeletion   | 20 | 1   | 0 | 16   |
| 53 | wild-type | codeletion   | 10 | 5   | 1 | 14   |
| 54 | wild-type | codeletion   | 15 | 2   | 1 | 0.5  |
| 55 | wild-type | no deletion  | 30 | 50  | 0 | 42   |
| 56 | wild-type | no deletion  | 35 | 1   | 0 | 36   |
| 57 | wild-type | 19q-deletion | 20 | 5   | 0 | 18   |
| 58 | mutation  | no deletion  | 40 | 70  | 0 | 28   |
| 59 | wild-type | codeletion   | 5  | 10  | 0 | 40   |
| 60 | wild-type | codeletion   | 8  | 0   | 0 | 26   |
| 61 | wild-type | codeletion   | 25 | 5   | 0 | 28   |
| 62 | wild-type | no deletion  | 40 | 90  | 0 | 15   |
| 63 | wild-type | codeletion   | 70 | 10  | 0 | 12   |
| 64 | wild-type | 19q-deletion | 12 | 20  | 0 | 18   |
| 65 | wild-type | no deletion  | 40 | 0   | 0 | 10   |
| 66 | wild-type | no deletion  | 40 | 10  | 0 | 17   |
| 67 | wild-type | no deletion  | 30 | 60  | 1 | 13.5 |
| 68 | wild-type | codeletion   | 8  | 5   | 0 | 18   |
| 69 | wild-type | codeletion   | 4  | 1   | 0 | 16   |
| 70 | wild-type | no deletion  | 20 | 30  | 1 | 4.5  |
| 71 | wild-type | no deletion  | 5  | 0   | 1 | 8    |
| 72 | wild-type | no deletion  | 40 | 10  | 1 | 4    |
| 73 | wild-type | codeletion   | 50 | 60  | 1 | 4    |
| 74 | wild-type | no deletion  | 40 | 30  | 1 | 12   |
| 75 | wild-type | 1p-deletion  | 30 | 20  | 1 | 5    |
| 76 | wild-type | no deletion  | 20 | 30  | 1 | 7    |
| 77 | wild-type | no deletion  | 40 | 80  | 1 | 3    |

|     |           |              |    |    |   |     |
|-----|-----------|--------------|----|----|---|-----|
| 78  | wild-type | no deletion  | 30 | 5  | 1 | 2   |
| 79  | wild-type | no deletion  | 30 | 5  | 1 | 18  |
| 80  | wild-type | no deletion  | 50 | 10 | 1 | 2   |
| 81  | wild-type | no deletion  | 25 | 30 | 0 | 17  |
| 82  | wild-type | codeletion   | 2  | 2  | 0 | 37  |
| 83  | wild-type | codeletion   | 10 | 10 | 0 | 36  |
| 84  | wild-type | codeletion   | 10 | 5  | 0 | 35  |
| 85  | wild-type | codeletion   | 5  | 0  | 0 | 34  |
| 86  | wild-type | no deletion  | 5  | 0  | 0 | 33  |
| 87  | wild-type | no deletion  | 25 | 1  | 1 | 5   |
| 88  | wild-type | codeletion   | 4  | 20 | 0 | 33  |
| 89  | wild-type | codeletion   | 7  | 10 | 0 | 32  |
| 90  | wild-type | codeletion   | 15 | 0  | 0 | 40  |
| 91  | wild-type | no deletion  | 20 | 30 | 1 | 5   |
| 92  | wild-type | 1p-deletion  | 70 | 30 | 1 | 0.5 |
| 93  | wild-type | 19q-deletion | 30 | 50 | 1 | 1   |
| 94  | wild-type | codeletion   | 8  | 3  | 0 | 25  |
| 95  | wild-type | codeletion   | 1  | 0  | 0 | 22  |
| 96  | wild-type | codeletion   | 1  | 0  | 0 | 18  |
| 97  | wild-type | codeletion   | 2  | 5  | 0 | 17  |
| 98  | wild-type | codeletion   | 5  | 0  | 0 | 29  |
| 99  | wild-type | no deletion  | 1  | 40 | 0 | 35  |
| 100 | wild-type | codeletion   | 10 | 0  | 0 | 12  |
| 101 | wild-type | codeletion   | 1  | 0  | 0 | 17  |
| 102 | wild-type | no deletion  | 20 | 5  | 1 | 6   |
| 103 | wild-type | codeletion   | 3  | 1  | 0 | 32  |
